1 **German-wide interlaboratory study compares consistency, accuracy**  
2 **and reproducibility of whole-genome short read sequencing**

3 Laura Uelze<sup>1</sup>, Maria Borowiak<sup>1</sup>, Erik Brinks<sup>2</sup>, Carlus Deneke<sup>1</sup>, Kerstin Stingl<sup>1</sup>, Sylvia Kleta<sup>1</sup>,  
4 Simon H. Tausch<sup>1</sup>, Kathrin Szabo<sup>3</sup>, Anne Wöhlke<sup>4</sup>, Burkhard Malorny<sup>1#</sup>

5 <sup>1</sup>Department of Biological Safety, German Federal Institute for Risk Assessment (BfR), Max-  
6 Dohrn-Str. 8-10, 10589 Berlin, Germany

7 <sup>2</sup>Department of Microbiology and Biotechnology, Max Rubner-Institut (MRI), Herrmann-  
8 Weigmann-Str. 1, 24103 Kiel, Germany

9 <sup>3</sup>Department 5, Federal Office of Consumer Protection and Food Safety (BVL), Diedersdorfer  
10 Weg 1, 12277 Berlin, Germany

11 <sup>4</sup>Food and Veterinary Institute, Lower Saxony State Office for Consumer Protection and Food  
12 Safety (LAVES), Dresdenstr. 2, 38124 Braunschweig, Germany

13 # Corresponding Author

14 [burkhard.malorny@bfr.bund.de](mailto:burkhard.malorny@bfr.bund.de)

15 Phone: +49 30 18412-24900

16 German Federal Institute for Risk Assessment

17 Study Centre for Genome Sequencing and Analysis

18 Department Biological Safety

19 Diedersdorfer Weg 1, 12277 Berlin, Germany

20 **Keywords:** interlaboratory study, whole-genome sequencing, food safety

## 21 **Abstract**

22 We compared the consistency, accuracy and reproducibility of next-generation short  
23 read sequencing between ten laboratories involved in food safety (research institutes,  
24 state laboratories, universities and companies) from Germany and Austria. Participants  
25 were asked to sequence six DNA samples of three bacterial species (*Campylobacter*  
26 *jejuni*, *Listeria monocytogenes* and *Salmonella enterica*) in duplicate, according to their  
27 routine in-house sequencing protocol. Four different types of Illumina sequencing  
28 platforms (MiSeq, NextSeq, iSeq, NovaSeq) and one Ion Torrent sequencing instrument  
29 (S5) were involved in the study. Sequence quality parameters were determined for all  
30 data sets and centrally compared between laboratories. SNP / and cgMLST calling were  
31 performed to assess the reproducibility of sequence data collected for individual  
32 samples. Overall, we found Illumina short read data to be more accurate and consistent  
33 than Ion Torrent sequence data, with little variation between the different Illumina  
34 instruments. Two laboratories with Illumina instruments submitted sequence data with  
35 lower quality, probably due to the use of a library preparation kit, which shows difficulty  
36 in sequencing low GC genome regions. Differences in data quality were more evident  
37 after assembling short reads into genome assemblies, with Ion Torrent assemblies  
38 featuring a great number of allele differences to Illumina assemblies. Clonality of  
39 samples was confirmed through SNP calling, which proved to be a more suitable  
40 method for an integrated data analysis of Illumina and Ion Torrent data sets, than  
41 cgMLST calling.

## 42 **1. Introduction**

43 Whole genome sequencing (WGS) is a high resolution, high-throughput method for the  
44 molecular typing of bacteria. Through bioinformatic analysis of bacterial genome  
45 sequences, it is not only possible to identify bacteria on a species and sub-species  
46 level, but also to identify antimicrobial resistance and virulence genes. Further, it is  
47 possible through a variety of methods, such as variant calling, k-mer based, or gene-by-  
48 gene approaches, to determine the relatedness / clonality between bacterial isolates,

49 making it the ideal tool for outbreak studies, routine surveillance and clinical diagnostics  
50 (Ronholm et al., 2016). Initially expensive and difficult to set up, the technology is  
51 becoming continuously more user-friendly and affordable (Uelze et al., 2020). In recent  
52 years, funding provided through federal initiatives has enabled public health and food  
53 safety laboratories in Germany and worldwide to acquire sequencing platforms. A  
54 number of different sequencing technologies exist, each with their own upsides and  
55 shortcomings. For example, Illumina sequencing platforms generally produce relatively  
56 short paired-end sequencing reads with high accuracy, while the more affordable Ion  
57 Torrent technology outputs single-end reads with often greater read lengths, but higher  
58 error rates (Quail et al., 2012; Fox et al., 2014; Salipante et al., 2014; Kwong et al.,  
59 2015; Escalona et al., 2016). Which sequencing platform different laboratories choose  
60 to acquire is not only dependent on financial resources, but also on individual needs  
61 and routine applications, with throughput, error rates / error types, read lengths and run  
62 time as the main concerning parameters. This leads to an increased diversification of  
63 the sequencing community (Moran-Gilad et al., 2015), creating a natural competition  
64 between producers, which benefits users through an ongoing improvement of  
65 technology and equipment. However, diversification also hampers standardization and  
66 despite ongoing calls for the establishment of agreed minimal sequencing quality  
67 parameters, this process has been much delayed (Endrullat et al., 2016).  
68 Increasingly, microbial disease surveillance systems are based on WGS data. For  
69 example, Pathogenwatch (<https://pathogen.watch>) is a global platform for genomic  
70 surveillance, which analyses genomic data submitted by users and conducts cgMLST  
71 clustering to monitor the spread of important bacterial pathogens. Similarly, the  
72 GenomeTrakr network uses whole-genome sequence data and performs cg/wgMLST  
73 and SNP calling to track food-borne pathogens ([https://www.fda.gov/food/whole-  
74 genome-sequencing-wgs-program/genometrakr-network](https://www.fda.gov/food/whole-genome-sequencing-wgs-program/genometrakr-network)) integrated into NCBI  
75 Pathogen Detection (<https://www.ncbi.nlm.nih.gov/pathogens/>). In Germany, a network  
76 of Federal State Laboratories and Federal Research Institutions supports the  
77 investigation of food-borne outbreaks through traditional typing and WGS methods. All  
78 genomic surveillance systems have in common that a high quality and accuracy of the  
79 sequencing data is crucial for a robust and reliable data analysis.

80 Proficiency testing (PT) is an important external quality assessment tool to ensure the  
81 accuracy and reproducibility of sequence data (Endrullat et al., 2016), whereas the aim  
82 of an interlaboratory study is to determine the variability of the results obtained by  
83 different collaborators. Several PT exercises with the focus on the sequencing of  
84 microbial pathogens have been published in recent years. In 2015, the GenomeTrakr  
85 network conducted a PT with 26 different US laboratories, which were instructed to  
86 sequence eight bacterial isolates according to a fixed protocol (Timme et al., 2018). In  
87 the same year, the Global Microbial Identifier (GM) initiative conducted an extensive  
88 survey with the aim to assess requirements and implementation strategies of PTs for  
89 bacterial whole genome sequencing (Moran-Gilad et al., 2015), followed by a series of  
90 global PT exercises ([https://www.globalmicrobialidentifier.org/Workgroups/GMI-  
91 Proficiency-Test-Reports](https://www.globalmicrobialidentifier.org/Workgroups/GMI-Proficiency-Test-Reports)). In an interlaboratory exercise in 2016, five laboratories from  
92 three European countries (Denmark, Germany, the Netherlands) were asked to  
93 sequence 20 *Staphylococcus aureus* DNA samples according to a specific protocol and  
94 report cgMLST cluster types (Mellmann et al., 2017). In this study, we present the  
95 results of an interlaboratory study for short-read bacterial genome sequencing with ten  
96 participating laboratories from German-speaking countries initiated by the §64 German  
97 Food and Feed Code (LFGB) working group “NGS Bacterial Characterisation” chaired  
98 by the Federal Office of Consumer Protection and Food Safety (BVL). The working  
99 group serves to validate and standardize WGS methods for pathogen characterization  
100 in the context of outbreak investigations. The interlaboratory study was carried out by  
101 the German Federal Institute of Risk Assessment (BfR) in 2019, with the aim to answer  
102 the question whether different WGS technology platforms provide comparable  
103 sequence data, taking into account the routine sequencing procedures established in  
104 these laboratories.

## 105 **2. Materials and Methods**

### 106 **2.1 Study design**

107 In the frame of the §64 LFGB working group “NGS Bacterial Characterisation”, we  
108 conducted a interlaboratory study for next-generation sequencing. Twelve teams  
109 participated in the study. Participants included four Federal Research Institutes (3  
110 German, 1 Austrian), four German State Laboratories, one German university and three  
111 German companies.  
112 Participants were provided with DNA samples (40-55 µl, 60-187 ng/µl) of six bacterial  
113 isolates (Table 1) (two of each *Campylobacter jejuni*, *Listeria monocytogenes* and  
114 *Salmonella enterica*), with the species of the sample visibly marked on the tube  
115 containing the sample DNA.  
116 Participants were instructed to sequence the samples according to their standard in-  
117 house sequencing procedure. Where possible, participants were asked to sequence  
118 each isolate in two independent sequencing runs. No minimum quality criteria for the  
119 resulting sequencing data were requested. Together with the samples, participants  
120 received a questionnaire to document their applied sequencing method. Participants  
121 were given four weeks to conduct the sequencing and report the resulting raw  
122 sequencing data. Sequencing data was exchanged through a cloud-based platform and  
123 data quality was centrally analysed with open-source programs and in-house  
124 bioinformatic pipelines. Results of the sequencing data analysis were presented to the  
125 members of the §64 LFGB working group in November 2019. Following the meeting,  
126 ten participants agreed to a publication of the results of the interlaboratory study. Two  
127 participants declined a publication of their data due to a conflict of interest. Participants  
128 are anomalously identified with their laboratory code LC01 – LC10 assigned for this  
129 study.

## 130 **2.2. Study isolates, cultivation and DNA isolation**

131 Detailed information to the samples is summarized in Supplementary File 1 (Tables S1  
132 to S3).  
133 The samples 19-RV1-P64-1 and 19-RV1-P64-2 were obtained from *Campylobacter*  
134 *jejuni* isolates (MLST type 4774 and 21 respectively). *Campylobacter jejuni* were pre-  
135 cultured on Columbia blood agar, supplemented with 5 % sheep blood (Oxoid, Wesel,

136 Germany) for 24 hours at 42 °C under micro-aerobic atmosphere (5% O<sub>2</sub>; 10% CO<sub>2</sub>). A  
137 single colony was inoculated on a fresh Columbia blood agar plate for an additional 24  
138 hours. After incubation, bacterial cells were re-suspended in buffered peptone water  
139 (Merck, Darmstadt, Germany) to an OD600 of 2. Genomic DNA was extracted from this  
140 suspension with the PureLink<sup>®</sup> Genomic DNA Mini Kit (Thermo Fisher Scientific,  
141 Dreieich, Germany) according to manual instructions.  
142 The samples 19-RV1-P64-3 and 19-RV1-P64-4 were obtained from *Listeria*  
143 *monocytogenes* serovar IIc and serovar IIb respectively. *Listeria monocytogenes* were  
144 cultured on sheep blood agar plates and incubated at 37°C over night. Genomic DNA  
145 was directly extracted from bacterial colonies using the QIAamp DNA Mini Kit (Qiagen,  
146 Hilden, Germany) following the manual instructions for gram-positive bacteria.  
147 The samples 19-RV1-P64-5 and 19-RV1-P64-6 were obtained from *Salmonella enterica*  
148 subsp. *enterica* serovar Infantis and serovar Paratyphi B var. Java respectively.  
149 *Salmonella enterica* were cultivated on LB agar (Merck). A single colony was inoculated  
150 in 4 ml liquid LB and cultivated under shaking conditions (180–220 rpm) at 37 °C for 16  
151 hours. Genomic DNA was extracted from 1 ml liquid cultures using the PureLink<sup>®</sup>  
152 Genomic DNA Mini Kit (Thermo Fisher Scientific) according to manual instructions.  
153 DNA quality of all samples was verified with Nanodrop and Qubit and samples were  
154 stored at 4 °C before being express shipped in liquid form on ice.

### 155 **2.3. PacBio reference sequences**

156 As Pacific Biosciences (herein abbreviated as PacBio) sequencing was performed  
157 before the interlaboratory study started, DNA extractions used for PacBio sequencing  
158 differentiated from DNA extractions used for short read-sequencing. For *Campylobacter*  
159 *jejuni*, *Listeria monocytogenes* and *Salmonella enterica* the PureLink<sup>®</sup> Genomic DNA  
160 Mini Kit (Invitrogen) was used for genomic DNA extraction.  
161 PacBio sequences for samples 19-RV1-P64-1 to 19-RV1-P64-5 were obtained from  
162 GATC as described before (Borowiak et al., 2018).  
163 Sample 19-RV1-P64-6 was sequenced in-house. Genomic DNA was sheared to  
164 approximately 10 kb using g-Tubes (Covaris, Brighton, U.K.) and library preparation was

165 performed using the SMRTbell Template Prep Kit 1.0 and the Barcode Adapter Kit 8A  
166 (Pacific Biosciences, Menlo Park, CA, USA). Sequencing was performed on a PacBio  
167 Sequel instrument using the Sequel® Binding Kit and Internal control Kit 3.0 and the  
168 Sequel® Sequencing Kit 3.0 (PacBio). Long read data was assembled using the  
169 HGAP4 assembler.  
170 Information to the PacBio sequences is summarized in Supplementary File 1 (Tables  
171 S2-S3).

## 172 **2.4. Whole-genome short read sequencing**

173 All ten participants followed their own in-house standard protocol for sequencing.  
174 Important sequencing parameters such as the type of library preparation and  
175 sequencing kits, as well as the type of sequencing instrument were documented with a  
176 questionnaire (the questionnaire template in German language is provided as  
177 Supplementary File 2). The results of the questionnaire are summarized in  
178 Supplementary File 3. All participants determined the DNA concentration prior to  
179 sequencing library preparation. Of ten participants, seven chose a restriction digest for  
180 DNA fragmentation, while three laboratories fragmented DNA through mechanical  
181 breakage. Over half of participants pooled sequence libraries relative to genome sizes  
182 and almost all (with the exception of laboratory LC01) included a control in the  
183 sequencing run (i.e. PhiX).  
184 All participants, with the exception of laboratories LC02 and LC08, sequenced samples  
185 in duplicates. Duplicates were defined as one sample sequenced in two independent  
186 sequencing runs on the same sequencing instrument, henceforth identified as  
187 sequencing run A and sequencing run B. Participants LC01, LC03, LC04, LC05, LC06,  
188 LC07, LC09, LC10 contributed 12 whole-genome sequencing data sets (combined  
189 forward and reverse reads) each, while participant LC08 contributed 6 whole-genome  
190 sequencing data sets. In contrast, laboratory LC02 sequenced the complete sample set  
191 on three different sequencing instruments in single runs, henceforth identified as  
192 LC02\_a (Illumina iSeq), LC02\_b (Illumina MiSeq), LC02\_c (Illumina NextSeq).  
193 Therefore, participant LC02 contributed 18 whole-genome sequencing data sets.



194 Together, 120 whole-genome sequencing data sets were available for analysis.  
195 Taken the fact into consideration, that participant LC02 used three different sequencing  
196 instruments, a total of twelve individual sequencing instruments were included in the  
197 interlaboratory study: one Ion Torrent S5 instrument (Thermo Fisher Scientific), two  
198 iSeq, six MiSeq, two NextSeq and one NovaSeq instrument (all Illumina).

## 199 **2.5. Assessment of raw sequencing data quality**

200 The quality of the sequencing reads was assessed with fastp (Chen et al., 2018) with  
201 default parameters. Quality control parameters for each data set (forward and reverse  
202 reads for Illumina data) such as the number of total reads and the Q30 (before filtering)  
203 were parsed from the resulting fastp json reports. The coverage depth was calculated  
204 as the sum of the length of all reads divided by the length of the respective PacBio  
205 reference sequence.

## 206 **2.6. Short-read genome assembling**

207 Raw Ion Torrent reads were trimmed using fastp v0.19.5 (Chen et al., 2018) with  
208 parameters `--cut_by_quality3 --cut_by_quality5 --cut_window_size 4 --`  
209 `cut_mean_quality 30`. Trimmed Ion Torrent reads were *de novo* assembled with SPAdes  
210 v3.13.1 (Nurk et al., 2013) with read correction.

211 Raw Illumina reads were trimmed and *de novo* assembled with our in-house developed  
212 Aquamis pipeline ([https://gitlab.com/bfr\\_bioinformatics/AQUAMIS/](https://gitlab.com/bfr_bioinformatics/AQUAMIS/)) which implements  
213 fastp (Chen et al., 2018) for trimming and shovill (based on SPAdes) ([https://github.com/](https://github.com/tseemann/shovill)  
214 [tseemann/shovill](https://github.com/tseemann/shovill)) for assembly. Unlike SPAdes, shovill automatically down samples  
215 reads to a coverage depth of 100x prior to assembling.

## 216 **2.7. Assessment of genome assembly quality and bacterial characterization**



217 Quality of the genome assemblies was assessed with QUAST v5.0.2  
218 (<https://github.com/ablab/quast>) without a reference. Quality parameters such as  
219 number of contigs, length of largest contig and N50 were parsed from the QUAST report  
220 text files for each assembly.  
221 Based on the genome assemblies (including the PacBio reference sequences),  
222 bacterial characterization was conducted with our in-house developed Bakcharak  
223 pipeline ([https://gitlab.com/bfr\\_bioinformatics/bakcharak](https://gitlab.com/bfr_bioinformatics/bakcharak)) which implements among  
224 other tools, ABRicate for antimicrobial resistance and virulence factor screening ([https://](https://github.com/tsmeeeann/abricate)  
225 [github.com/tsmeeeann/abricate](https://github.com/tsmeeeann/abricate)), and the PlasmidFinder database for plasmid detection  
226 (Carattoli et al., 2014), mlst (<https://github.com/tseemann/mlst>), SISTR (Yoshida et al.,  
227 2016) for *in silico* Salmonella serotyping and Prokka (Seemann, 2014) for gene  
228 annotation.

## 229 **2.8. CgMLST allele calling**

230 CgMLST allele calling was conducted with our in-house developed chewieSnake  
231 pipeline ([https://gitlab.com/bfr\\_bioinformatics/chewieSnake](https://gitlab.com/bfr_bioinformatics/chewieSnake)) which implements  
232 chewBBACA (Silva et al., 2018). Only complete coding DNA sequences, with start and  
233 stop codon, according to the NCBI genetic code table 11, are identified as alleles by  
234 chewBBACA (with Prodigal 2.6.0 (Hyatt et al., 2010)). CgMLST allele distance matrices  
235 are computed with grapetree (ignoring missing data in pairwise comparison).  
236 CgMLST schemes for *Listeria monocytogenes* (Ruppitsch et al., 2015) were derived  
237 from the cgMLST.org nomenclature server (<https://www.cgmlst.org/>). CgMLST schemes  
238 for *Campylobacter jejuni* and *Salmonella enterica* were derived from the chewBBACA  
239 nomenclature server (<http://chewbbaca.online/>).

## 240 **2.9. SNP calling**

241 SNP (single-nucleotide polymorphism) calling was conducted for each sample.  
242 Sequencing reads were trimmed prior to SNP calling. Assembled uncirculated PacBio  
243 sequences of the samples were used as reference sequences for SNP calling. SNP

244 calling was conducted with our in-house developed snippySnake pipeline  
245 ([https://gitlab.com/bfr\\_bioinformatics/snippy-snake](https://gitlab.com/bfr_bioinformatics/snippy-snake)) which implements snippy v4.1.0  
246 (<https://github.com/tseemann/snippy>).

### 247 **3. Results**

#### 248 **3.1. Comparison of quality of sequencing reads**

249 One important parameter to assess the quality of sequencing reads is the phred quality  
250 score. Commonly a Q score of 30 is used, which indicates a base call accuracy of  $\geq 99.9$   
251 %. We compared the percentages of bases that have a quality score equal or larger to  
252 30. The results visualized in Figure 1 (see Supplementary File 4 for exact numbers),  
253 show that on average  $\sim 90$  % of Illumina bases have a Q score  $\geq Q30$ , while only  $\sim 40$  %  
254 of Ion Torrent bases achieve a Q score  $\geq Q30$ . Therefore, the base call accuracy of  
255 Illumina data is greater than that of Ion Torrent data. There is little variation within the  
256 Illumina instrument series (mean values: iSeq: 91.7 %; MiSeq: 90.8 %; NextSeq: 90.4  
257 %; NovaSeq: 92.4 %), indicating that no particular instrument of the series out or under  
258 performs the others. In contrast, sequencing data with higher or lower quality scores  
259 was consistently associated with individual laboratories. Among the participants  
260 employing Illumina instruments, LC08 overall produced the lowest quality data (LC08  
261 mean: 82.1 %), while LC02\_b produced the highest quality data (LC02\_b mean: 97.9  
262 %), both with a MiSeq instrument. Interestingly, the same laboratory LC02 remained  
263 behind the average for Illumina data when employing a NextSeq instrument (LC02\_c  
264 mean: 87.1 %). Of course, sequence quality might also depend on loading  
265 concentration and number of cycles used for sequencing. Quality scores remained  
266 largely consistent between runs. Equally, the type of bacterial species had little  
267 influence on sequencing data quality.

268 We further assessed the total number of reads and bases of each data set. Since  
269 ideally there is little variation in the length of the reads (for Illumina), the number of  
270 reads is closely correlated with the total number of produced bases, as can be seen  
271 from Supplementary File 4. To achieve a reasonable coverage over the whole genome

272 a minimum number of reads / total bases is required (this can be easily calculated when  
273 a suitable reference genome is available).

274 As visualized in Figure 2, the total number of produced bases varied across  
275 laboratories, instruments and samples, as well as between sequencing runs. For  
276 example, for sample 19-RV1-P64-1, laboratory LC10 produced the greatest number of  
277 sequencing bases: ~1.8 billion base (~12.2 million reads), while laboratory LC02\_b  
278 produced the lowest number of sequencing bases: ~0.8 billion bases (~0.4 million  
279 reads). The number of reads / total number of bases has a direct influence on the  
280 coverage depth (in this study calculated by the total number of bases divided by the  
281 length of the PacBio reference). Sufficient coverage depth is an important requirement  
282 for successful downstream analysis, such as variant detection and assembly. However,  
283 up to now there is no widespread consensus for the recommended minimum coverage  
284 depth for bacterial whole genome sequencing. In the accompanying questionnaire,  
285 participants stated that they intended to achieve a coverage depth ranging from >20x to  
286 <300x, with most participants opting for a coverage depth of 60x to 70x. Actual  
287 coverage depths ranged from 26x (LC03, 19-RV1-P64-5, run A) to 1201x (LC10, 19-  
288 RV1-P64-1, run B), with most data sets featuring coverage depths from 75x to 196x  
289 ( $Q_{0.25}$  and  $Q_{0.75}$ ). With the exception of a small number of data sets (LC03: 19-RV1-P64-  
290 2, 19-RV1-P64-5, 19-RV1-P64-6; LC05: 19-RV1-P64-6, all run A), all other data sets  
291 were well above a coverage depth of 30x. Similarly, to the total number of produced  
292 reads, actual coverage depths varied between laboratories, instruments and samples,  
293 as well as between sequencing runs. In concordance with the high number of total  
294 reads / bases, laboratory LC10 produced data sets with very high coverage depths with  
295 an average of 736x. When coverage depths were normalized, by assigning a coverage  
296 depth of 1 to sample 19-RV1-P64-1 of each group, we found that coverage depths  
297 varied in a predictable manner in relation to the genome size of the sample as shown in  
298 Figure 4. Some participants chose to pool sequencing libraries relative to genome sizes  
299 of the samples, which in most cases ensured a more consistent sequencing depth  
300 across the samples (LC02\_a, LC03, LC04, LC06). In comparison, participants that  
301 pooled sequencing libraries of all samples equally (LC01, LC05, LC07, LC08, LC10)  
302 obtained lower coverage depths for bacterial isolates with larger genome sizes (i.e. ~4.9

303 Mbp for *Salmonella enterica*), and high coverage depths for bacterial isolates with  
304 smaller genome sizes (i.e. ~1.7 Mbp *Campylobacter jejuni*). However, in most cases  
305 pooling the DNA libraries relative to genome size only reduced the impact of the  
306 genome size effect, without eliminating it. Only laboratory LC06 achieved a high  
307 consistency across all samples.

### 308 **3.1. Comparison of quality of genome assemblies and bacterial characterization**

309 The genome assemblies constructed from the short read data were assessed and all  
310 determined quality parameters are listed in Supplementary File 4. We found little  
311 variation in the length of the genome assemblies within the short read assemblies (sd  
312 values for the samples ranged from ~3 Kbp to ~11 Kbp). However, all short read  
313 assemblies were ~36 to ~66 Kbp shorter than their respective PacBio references, likely  
314 due to overlapping end regions in the PacBio sequences, which were not circularized  
315 prior to analysis.

316 Similarly, there was little variation for the calculated GC values (sd values for the  
317 samples ranged from 0.01 to 0.03 %). Besides the length, the quality of genome  
318 assemblies is determined by the total number of contigs, and the size of the largest  
319 contig, with assemblies featuring fewer, larger contigs generally being more useful for  
320 downstream analyses. Both parameters are combined in the N50 value, which is  
321 defined as the length of the shortest contig in the set of largest contigs that together  
322 constitute at least half of the total assembly size. The N50 values for all assemblies are  
323 visualized in Figure 5. We found N50 values to be overall very similar for individual  
324 samples, regardless of which laboratory or instrument provided the sequencing data,  
325 with a few notable exceptions (i.e. LC06, LC08). In general, highest N50 values were  
326 obtained for *Listeria monocytogenes* samples (19-RV1-P64-3: ~600 Kbp; 19-RV1-P64-  
327 4: ~480 Kbp), followed by *Salmonella enterica* samples (19-RV1-P64-5: ~200 Kbp; 19-  
328 RV1-P64-6: ~340 Kbp), and *Campylobacter jejuni* samples (19-RV1-P64-1: ~220 Kbp;  
329 19-RV1-P64-2: ~180 Kbp).

330 Assemblies of laboratories LC06 and LC08 consistently had much lower N50 values  
331 (also shown by a higher total number of contigs and shorter contigs lengths), compared

332 to the rest of the group. For example, while the majority of assemblies achieved an N50  
333 of ~ 605 Kbp ( $\pm$  550 bp) for sample 19-RV1-P64-3, the N50 for assemblies of LC06  
334 ranged around ~ 256 Kbp, while the N50 for assemblies of laboratory LC08 was even  
335 lower (~71 Kbp). Interestingly, no linear correlation was apparent between the N50  
336 value and the coverage depth as shown in Figure 6.

337 Coding frames in the genome assemblies were annotated to determine the MLST type,  
338 as well as resistance and virulence genes. In total, there was little variation for the total  
339 number of detected CDS (defined as a sequence containing a start and stop codon).  
340 The total number of CDSs varied by sample (19-RV1-P64-1:  $n \sim 1597$ ; 19-RV1-P64-2:  
341  $n \sim 1713$ ; 19-RV1-P64-3:  $n \sim 2892$ ; 19-RV1-P64-4:  $n \sim 2913$ ; 19-RV1-P64-5:  $n \sim 4667$ ;  
342 19-RV1-P64-6:  $n \sim 4393$ ) with a standard deviation of 8 to 15 coding frames.

343 The Multilocus Sequence Type (MLST) was determined correctly for all data sets. The  
344 same plasmid markers could be detected from all short read genome assemblies. Two  
345 more plasmid markers (*Col8282\_1* and *ColRNAI\_1*) could be detected in the short read  
346 assemblies compared to the PacBio reference for 19-RV1-P64-6, likely due to the fact  
347 that small plasmids are often excluded from PacBio sequences (read lengths too short).  
348 In three cases, resistance genes detected in the PacBio references were not present in  
349 the short read assemblies: *bla*<sub>OXA-184</sub> in 19-RV1-P64-1, of laboratory LC06 (run A) and  
350 *aadA1* in 19-RV1-P64-6, of laboratory LC09 (both runs).

351 Although overall the same virulence genes could be detected from all short-read  
352 assemblies, there was some variation with assemblies from laboratories LC01, LC06  
353 and LC08 often missing virulence genes (Supplementary File 4). For example, virulence  
354 factors *flaA* and *flaB* could not be detected in assemblies from laboratory LC01 for  
355 sample 19-RV1-P64-1. Interestingly, the same two genes were present in both  
356 assemblies of laboratory LC01 for sample 19-RV1-P64-2, but absent in all other  
357 assemblies for this sample. In another example the genes *sopD2* and *sseK1* could not  
358 be detected from the assembly for sample 19-RV1-P64-5 from laboratory LC08. The  
359 absence of virulence and resistance genes is likely caused by contig borders.

### 360 **3.3. CgMLST calling**

361 CgMLST was conducted to compare the effect of differences in the genome assemblies  
362 on clustering. All cgMLST distance allele matrices are presented in Supplementary File  
363 5. The cgMLST distance matrix for sample 19-RV1-P64-1 is visualized in Figure 7.  
364 CgMLST distance matrices for the six samples were overall very similar. In general,  
365 most assemblies had zero allele differences. However, assemblies constructed from Ion  
366 Torrent short read data (LC01) generally had a much higher number of allele  
367 differences, than those constructed from Illumina short reads. For easy comparison, we  
368 calculated the 'median cgMLST distance' for each assembly, by computing the medium  
369 of all allele differences to a specific assembly (compare Figure 7).  
370 Figure 8 shows the median cgMLST distance for all assemblies. As mentioned the  
371 highest number of allele differences were calculated for the assemblies of laboratory  
372 LC01 (using an Ion Torrent instrument). However, allele differences for the Ion Torrent  
373 assemblies varied dependent on the species of the sample. The smallest number of  
374 cgMLST allele differences were obtained for *Listeria monocytogenes* samples (LC01: ~  
375 7.1), followed by *Campylobacter jejuni* samples (LC01: ~ 11.1) and *Salmonella enterica*  
376 samples (LC01: ~ 26.1). Illumina assembly generally had much lower allele differences.  
377 Median cgMLST allele differences for the assemblies of the laboratories LC02a, LC02b,  
378 LC02c, LC03, LC04, and LC010 were zero for all samples. Median allele differences for  
379 assemblies of the laboratories LC05, LC06, LC07, LC08, and LC09 were between zero  
380 and three, often slightly higher for laboratories LC05 and LC08. Interestingly, the  
381 assembly of sample 19-RV1-P64-6 produced in run A by LC05 featured a median  
382 number of 10 alleles, while the assembly produced in the independent run B by LC05  
383 had a median number of zero allele differences.  
384 We further compared the effect of the assembly algorithm on the cgMLST calling by  
385 assembling trimmed Illumina reads with SPAdes (as opposed to shovill) prior to cgMLST  
386 calling. However, no significant difference was found in the number of allele differences  
387 (data not shown).

### 388 **3.4. SNP calling**



389 SNP calling was conducted to detect sequencing errors. The assembled PacBio  
390 sequences were used as reference sequences. All SNP distance allele matrices are  
391 presented in Supplementary File 6. No SNPs were detected within the data sets.  
392 Equally, all data sets featured zero SNPs to the reference sequence, with the exception  
393 of the PacBio reference for sample 19-RV1-P64-5, to which all data sets had 2 SNPs.

## 394 **Discussion**

395 We conducted an interlaboratory study for the investigation of the reproducibility and  
396 consistency of bacterial whole-genome sequencing. Ten participants were instructed to  
397 sequence six DNA samples in duplicate according to their in-house standard procedure  
398 protocol. We were interested to see, how the quality of sequencing data varied across  
399 different sequencing instruments, library preparation kits, sequencing kits and individual  
400 expertise of the participating laboratories. Overall, we were able to compare 12 Illumina  
401 sequencing instruments and one Ion Torrent instrument.

402 It is well known that different sequencing technologies vary in their average error rates,  
403 with Ion Torrent data generally having higher error rates compared to Illumina (Quail et  
404 al., 2012; Fox et al., 2014; Salipante et al., 2014; Kwong et al., 2015; Escalona et al.,  
405 2016). Indeed, we assessed that Ion Torrent bases achieved much lower quality scores  
406 than Illumina bases (Ion Torrent Q30: ~ 35-50 %, Illumina Q30: ~ 80 – 95 %).

407 Interestingly, we found the four different Illumina sequencing instruments types involved  
408 in our study (iSeq, MiSeq, NextSeq, NovaSeq) to be very similar in terms of base  
409 quality, suggesting that the underlying sequencing technology is very similar, despite the  
410 different color chemistry used.

411 There was a great variety in the number of total bases that participants obtained for  
412 their data sets, resulting in great fluctuations for the coverage depth (ranging from 26x  
413 to 1200x). Although no widely accepted minimal coverage depth for bacterial whole-  
414 genome sequencing is established yet, most studies recommended coverage depths  
415 ranging from  $\geq 30x$  to  $\geq 50x$  (Chun et al., 2018). Positively, most data sets submitted by  
416 the participants in our study had coverage depths well above 30x, demonstrating that  
417 insufficient coverage depth is not usually a concern. However, coverage depths



418 frequently fell short of the intended coverage depths stated by participants in the  
419 accompanying questionnaire, indicating that this parameter is not always well controlled  
420 for. For example, while laboratory LC02\_b aimed for a coverage depth of  $\geq 60x$ , the  
421 majority of data sets submitted by this laboratory had a much lower coverage depth (30-  
422 50x). Similarly, laboratory LC01, LC02a, LC05 and LC08 frequently obtained lower than  
423 intended coverage depths.

424 Resulting from experience and producer instructions, users generally know the number  
425 of reads / total bases that their sequencing instrument is capable of producing in one  
426 sequencing run. By pooling DNA libraries relative to genome sizes (provided the  
427 species of the isolates is known), users can influence the number of reads / bases and  
428 therefore the coverage depth for each isolate. As was shown in this study, participants  
429 that pooled DNA libraries prior to sequencing relative to genome sizes achieved more  
430 consistent coverage depths across the three species (e.g. LC06), while participants that  
431 pooled all DNA libraries equally, obtained sequencing data with predictable fluctuation in  
432 coverage depth (i.e. LC10), depending on the genome size of the organism.

433 Both, too low (problematic for variance calling / fragmented assembly) and too high  
434 (increased 'noisiness' of the data since the number of sequencing errors increases with  
435 the read number / the assembly graph is too complex and cannot be resolved) coverage  
436 depths can have negative effects on downstream analysis. For this reason, updated  
437 assembly algorithm, such as shovill, 'down sample' data to a moderate coverage prior to  
438 assembly (e.g. shovill down samples to 100x). Indeed, we did not find a linear  
439 correlation between coverage depth and N50 (i.e. the very high coverage depths  
440 observed for some data sets had neither positive nor negative effects on assembly  
441 quality). Nevertheless, we recommend that sequencing laboratories pool DNA libraries  
442 by genome sizes prior to sequencing in order to produce sequencing data with  
443 consistent coverage depth for optimal downstream analysis. This has the additional  
444 benefit that smart pooling strategies decrease the sequencing costs, as a greater  
445 number of samples can be sequenced in one run.

446 We employed SNP calling for the detection of potential sequencing errors in the  
447 trimmed sequence reads, as well as for assessing the utility of a SNP calling approach  
448 for an integrated outbreak analysis with data from different sequencing platforms. Given

449 that participants were provided with purified DNA samples, thereby eliminating the  
450 potential for the development of mutations during cultivation, any SNP potentially flags a  
451 sequencing error. Positively, we detected zero SNPs within the data sets. The fact that  
452 all data sets of sample 19-RV1-P64-5 differed in two SNPs from the respective PacBio  
453 reference, either points to a sequence error within the PacBio reference, or might  
454 indicate that the strain underwent mutations between the independent cultivations for  
455 short read and long read sequencing DNA isolation.

456 We further constructed *de novo* assemblies from the short read sequence data to  
457 assess the influence of variations in sequence data quality on assembly-based  
458 downstream analysis. To eliminate assembler specific effects we strove to construct all  
459 assemblies in an equal manner. Naturally, single-end Ion Torrent data requires different  
460 assembly algorithm, than those employed for paired-end Illumina data, which hampers  
461 a direct comparison.

462 Nevertheless, we found that all assemblies were overall very similar, with respect to  
463 assembly length, N50, GC and the number of CDSs, with a few notable exceptions. In  
464 particular, assemblies constructed from short read data of laboratories LC06 and LC08  
465 (both using a MiSeq Illumina instrument) had much lower N50 values and a greater  
466 number of contigs, probably due their use of the Nextera XT DNA Library Preparation  
467 Kit, which was recently shown to have a strong GC bias (Grützke et al., 2019; Sato et  
468 al., 2019; Uelze et al., 2019) (also compare Supplementary File 7). This is a concern  
469 since a high number of contigs in a genome assembly may cause a fragmentation of  
470 genes at the contigs borders, thereby affecting gene annotation and multilocus  
471 sequence typing. Furthermore we found that Ion Torrent assemblies differed from  
472 Illumina assemblies in length (slightly shorter), N50 (slightly lower), GC (slightly lower)  
473 and number of CDSs (slightly increased).

474 Complementary to SNP calling, we employed a cgMLST approach to compare genome  
475 assemblies in a simulated outbreak analysis. Noteworthy, cgMLST revealed a major  
476 distinction between Illumina and Ion Torrent data with assemblies constructed from Ion  
477 Torrent reads generally computing a much greater number of allele differences  
478 (Illumina: ~ 0-3 allele differences, Ion Torrent: ~10-30 allele differences). We suspect  
479 that this increased number of allele differences is caused by frame shifts in the Ion

480 Torrent assemblies. While the typical error type associated with Illumina reads are  
481 randomly distributed incorrect bases (substitution error) which do not cause frame  
482 shifts, Ion Torrent reads are prone to systematic insertions and deletions errors which  
483 lead to frame shifts in coding sequences (Buermans and den Dunnen, 2014; Escalona  
484 et al., 2016). Given that the cgMLST method employed in this study identifies coding  
485 frames based on their start and stop codons (as opposed to methods which implement  
486 a similarity based BLASTn search against a set of reference loci for allele identification),  
487 frame shifts will have a major effect on allele detection, thereby likely causing the  
488 observed increased number of allele differences. This is further supported by the low  
489 reproducibility of the Ion Torrent assemblies with up to 24 allele differences between two  
490 independent sequencing runs for the same sample.

491 From our results, SNP calling seems to be the method of choice for a combined  
492 outbreak analysis which integrates Illumina and Ion Torrent data sets in concordance  
493 with earlier studies (Kaas et al., 2014), due to the fact that Ion Torrent typical indels, as  
494 well as heterozygous or low quality sites are excluded from SNP calling. Through SNP  
495 calling it was possible to correctly identify the clonality between data sets for the same  
496 sample (i.e. there were zero SNPs between the Illumina and the Ion Torrent data sets  
497 for all samples). CgMLST calling, on the other hand would have produced much  
498 confusion in a real outbreak study, by suggesting that DNA samples sequenced with Ion  
499 Torrent were obtained from isolates relatively unrelated from those sequenced with  
500 Illumina.

501 These seemingly contradictory results can be explained by the stringent variant filtering  
502 prior to SNP calling, which eliminates the effect of Ion Torrent typical insertion and  
503 deletion errors. However, masking of indels and other low quality sites might also  
504 decrease the number of SNPs detected in total, thus leading to a lower resolution.  
505 SNP calling further has the advantage that no assembling step is required, for which  
506 currently no optimized assembly algorithm is available for Ion Torrent, thereby avoiding  
507 the introduction of assembly biases. Although we additionally assembled Illumina reads  
508 with SPAdes to increase the comparability to Ion Torrent assemblies (currently Shovill is  
509 unable to assemble Ion Torrent reads), SPAdes remains inherently tailored for Illumina  
510 reads and cgMLST calling was not improved with all SPAdes assemblies. Given that

511 many surveillance platforms perform cgMLST or wgMLST for (pre-)clustering (Uelze et  
512 al., 2020) the observed differences between Illumina and Ion Torrent assemblies might  
513 potentially lead to erroneous clustering results and disrupt outbreak studies.

## 514 **Conclusion**

515 We found that seven of nine participants with Illumina sequencing instruments were  
516 able to obtain reproducible sequence data with consistent high quality. Two participants  
517 with Illumina instruments submitted data with lower quality, probably due to the use of a  
518 library preparation kit, which shows difficulty in sequencing low GC genome regions.  
519 The only Ion Torrent instrument included in our study was inferior in terms of sequence  
520 data quality and assembly accuracy. We found a SNP calling approach to be more  
521 suitable for an integrated data and outbreak analysis of Ion Torrent and Illumina data  
522 than a cgMLST calling approach.

523 In the future, sequencing laboratories will continue to adapt and modify their laboratory  
524 protocols in order to optimize sequencing data quality, throughput and user-friendliness,  
525 while striving for the most cost and time-effective procedure. We welcome these efforts  
526 by innovative and thoughtful staff, which should not be unnecessarily hampered by  
527 overly rigid procedural protocols. Instead, a set of widely accepted, scientifically based  
528 and sensible minimal sequencing quality parameters, together with good standard  
529 practice protocols are urgently needed to ensure a consistent high quality of sequencing  
530 data for comparative data analysis.

531 Continuous interlaboratory testing, such as the one employed in this study and external  
532 PTs, will play an important role in ensuring that laboratories of the diverse public health  
533 setting adhere to these standards, while providing important feedback to participants on  
534 their competency level. Open or anonymous sharing of sequencing parameters allows  
535 an assessment of the utility of different sequencing approaches and helps to identify  
536 potential user issues. In the best case, interlaboratory studies promote knowledge and  
537 expertise sharing, enabling laboratories to adopt the sequencing procedures best suited  
538 for their unique setting, while simultaneously contributing to a standardization of the

539 technology, which will greatly improve the efficacy of sequencing data for surveillance,  
540 outbreak analyses and comparative studies.

## 541 **Abbreviations**

|     |        |                                        |
|-----|--------|----------------------------------------|
| 542 | BLAST  | basic local alignment search tool      |
| 543 | cgMLST | core genome multilocus sequence typing |
| 544 | DNA    | deoxyribonucleic acid                  |
| 545 | MLST   | multilocus sequence typing             |
| 546 | NGS    | next-generation sequencing             |
| 547 | SNP    | single-nucleotide polymorphism         |
| 548 | ST     | sequence type                          |
| 549 | PT     | Proficiency testing                    |
| 550 | wgMLST | whole-genome MLST                      |
| 551 | WGS    | whole genome sequencing                |

## 552 **Data Availability**

553 Sequencing data for all data sets analysed in this study has been deposited in the  
554 European Nucleotide Archive (ENA) under the study accession number PRJEB37768.

## 555 **Acknowledgements**

556 This work was supported by the German Federal Institute for Risk Assessment (BfR).

557 The BfR has received financial support from the Federal Government for Laura Uelze  
558 on the basis of a resolution of the German Bundestag by the Federal Government and  
559 funded by the Ministry of Health within the framework of the project "Integrated genome-  
560 based surveillance of *Salmonella* (GenoSalmSurv)", decision ZMV11-2518FSB709 of  
561 26/11/2018.

562 LU, MB and BM designed the study. LU and MB coordinated the interlaboratory study.  
563 LU and CD conducted the bioinformatic analysis and evaluation of the sequencing data  
564 quality. CD and ST developed the in-house bioinformatic pipelines used for analysis of  
565 the sequencing data. BM supervised the project. LU wrote the manuscript and created  
566 the figures. All authors read and approved the manuscript.

567 We are grateful for the continuous collaboration with the National Reference Laboratory  
568 for *Salmonella*, as well as the National Reference Laboratory for *Listeria*  
569 *monocytogenes* and the National Reference Laboratory for *Campylobacter* who kindly  
570 provided us with the bacterial isolates and DNA samples.

571 We thank Beatrice Baumann and Katharina Thomas (BfR), Sara Walter (LAVES) and  
572 Adrian Prager (MRI) for their excellent laboratory assistance.

## 573 **References**

- Benjamini, Y., and Speed, T. P. (2012). Summarizing and correcting the GC content bias in high-throughput sequencing. *Nucleic Acids Res.* 40, e72–e72. doi:10.1093/nar/gks001.
- Borowiak, M., Fischer, J., Baumann, B., Hammerl, J. A., Szabo, I., and Malorny, B. (2018). Complete genome sequence of a VIM-1-producing *Salmonella enterica* subsp. *enterica* serovar Infantis isolate derived from minced pork meat. *Genome Announc.* 6, e00327-18. doi:10.1128/genomeA.00327-18.
- Buermans, H. P. J., and den Dunnen, J. T. (2014). Next generation sequencing technology: Advances and applications. *Biochim. Biophys. Acta BBA - Mol. Basis Dis.* 1842, 1932–1941. doi:10.1016/j.bbadis.2014.06.015.
- Carattoli, A., Zankari, E., García-Fernández, A., Voldby Larsen, M., Lund, O., Villa, L., et al. (2014). *In silico* detection and typing of plasmids using PlasmidFinder and plasmid multilocus sequence typing. *Antimicrob. Agents Chemother.* 58, 3895–3903. doi:10.1128/AAC.02412-14.
- Chen, S., Zhou, Y., Chen, Y., and Gu, J. (2018). fastp: an ultra-fast all-in-one FASTQ preprocessor. *Bioinformatics* 34, i884–i890. doi:10.1093/bioinformatics/bty560.

- Chun, J., Oren, A., Ventosa, A., Christensen, H., Arahal, D. R., da Costa, M. S., et al. (2018). Proposed minimal standards for the use of genome data for the taxonomy of prokaryotes. *Int. J. Syst. Evol. Microbiol.* 68, 461–466. doi:10.1099/ijsem.0.002516.
- Endrullat, C., Glökler, J., Franke, P., and Frohme, M. (2016). Standardization and quality management in next-generation sequencing. *Appl. Transl. Genomics* 10, 2–9. doi:10.1016/j.atg.2016.06.001.
- Escalona, M., Rocha, S., and Posada, D. (2016). A comparison of tools for the simulation of genomic next-generation sequencing data. *Nat. Rev. Genet.* 17, 459–469. doi:10.1038/nrg.2016.57.
- Fox, E. J., Reid-Bayliss, K. S., Emond, M. J., and Loeb, L. A. (2014). Accuracy of next generation sequencing platforms. *J. Gener. Seq. Appl.* 1. doi:10.4172/jngsa.1000106.
- Grützke, J., Malorny, B., Hammerl, J. A., Busch, A., Tausch, S. H., Tomaso, H., et al. (2019). Fishing in the soup – pathogen detection in food safety using metabarcoding and metagenomic sequencing. *Front. Microbiol.* 10, 1805. doi:10.3389/fmicb.2019.01805.
- Hyatt, D., Chen, G.-L., LoCascio, P. F., Land, M. L., Larimer, F. W., and Hauser, L. J. (2010). Prodigal: prokaryotic gene recognition and translation initiation site identification. *BMC Bioinformatics* 11, 119. doi:10.1186/1471-2105-11-119.
- Kaas, R. S., Leekitcharoenphon, P., Aarestrup, F. M., and Lund, O. (2014). Solving the problem of comparing whole bacterial genomes across different sequencing platforms. *PLoS ONE* 9, e104984. doi:10.1371/journal.pone.0104984.
- Kwong, J. C., Mccallum, N., Sintchenko, V., and Howden, B. P. (2015). Whole genome sequencing in clinical and public health microbiology. *Pathology (Phila.)* 47, 199–210. doi:10.1097/PAT.0000000000000235.
- Mellmann, A., Andersen, P. S., Bletz, S., Friedrich, A. W., Kohl, T. A., Lilje, B., et al. (2017). High interlaboratory reproducibility and accuracy of next-generation-sequencing-based bacterial genotyping in a ring trial. *J. Clin. Microbiol.* 55, 908–913. doi:10.1128/JCM.02242-16.
- Moran-Gilad, J., Pedersen, S. K., Wolfgang, W. J., Pettengill, J., Strain, E., Hendriksen, R. S., et al. (2015). Proficiency testing for bacterial whole genome sequencing: an end-user survey of current capabilities, requirements and priorities. *BMC Infect. Dis.* 15, 174. doi:10.1186/s12879-015-0902-3.
- Nurk, S., Bankevich, A., Antipov, D., Gurevich, A., Korobeynikov, A., Lapidus, A., et al. (2013). “Assembling genomes and mini-metagenomes from highly chimeric reads,” in *Research in Computational Molecular Biology*, eds. M. Deng, R. Jiang,



- F. Sun, and X. Zhang (Berlin, Heidelberg: Springer Berlin Heidelberg), 158–170. doi:10.1007/978-3-642-37195-0\_13.
- Quail, M., Smith, M. E., Coupland, P., Otto, T. D., Harris, S. R., Connor, T. R., et al. (2012). A tale of three next generation sequencing platforms: comparison of Ion torrent, pacific biosciences and illumina MiSeq sequencers. *BMC Genomics* 13, 341. doi:10.1186/1471-2164-13-341.
- Ramírez, F., Ryan, D. P., Grüning, B., Bhardwaj, V., Kilpert, F., Richter, A. S., et al. (2016). deepTools2: a next generation web server for deep-sequencing data analysis. *Nucleic Acids Res.* 44, W160–W165. doi:10.1093/nar/gkw257.
- Ronholm, J., Nasheri, N., Petronella, N., and Pagotto, F. (2016). Navigating microbiological food safety in the era of whole-genome sequencing. *Clin. Microbiol. Rev.* 29, 837–857. doi:10.1128/CMR.00056-16.
- Ruppitsch, W., Pietzka, A., Prior, K., Bletz, S., Fernandez, H. L., Allerberger, F., et al. (2015). Defining and evaluating a core genome multilocus sequence typing scheme for whole-genome sequence-based typing of *Listeria monocytogenes*. *J. Clin. Microbiol.* 53, 2869–2876. doi:10.1128/JCM.01193-15.
- Salipante, S. J., Kawashima, T., Rosenthal, C., Hoogestraat, D. R., Cummings, L. A., Sengupta, D. J., et al. (2014). Performance comparison of Illumina and Ion Torrent next-generation sequencing platforms for 16S rRNA-based bacterial community profiling. *Appl. Environ. Microbiol.* 80, 7583–7591. doi:10.1128/AEM.02206-14.
- Sato, M. P., Ogura, Y., Nakamura, K., Nishida, R., Gotoh, Y., Hayashi, M., et al. (2019). Comparison of the sequencing bias of currently available library preparation kits for Illumina sequencing of bacterial genomes and metagenomes. *DNA Res.* 26, 391–398. doi:10.1093/dnares/dsz017.
- Seemann, T. (2014). Prokka: rapid prokaryotic genome annotation. *Bioinforma. Oxf. Engl.* 30, 2068–2069. doi:10.1093/bioinformatics/btu153.
- Silva, M., Machado, M. P., Silva, D. N., Rossi, M., Moran-Gilad, J., Santos, S., et al. (2018). chewBBACA: A complete suite for gene-by-gene schema creation and strain identification. *Microb. Genomics* 4. doi:10.1099/mgen.0.000166.
- Timme, R. E., Rand, H., Sanchez Leon, M., Hoffmann, M., Strain, E., Allard, M., et al. (2018). GenomeTrakr proficiency testing for foodborne pathogen surveillance: an exercise from 2015. *Microb. Genomics* 4. doi:10.1099/mgen.0.000185.
- Uelze, L., Borowiak, M., Deneke, C., Szabó, I., Fischer, J., Tausch, S. H., et al. (2019). Performance and accuracy of four open-source tools for *in silico* serotyping of *Salmonella* spp. based on whole-genome short-read sequencing data. *Appl. Environ. Microbiol.* 86, e02265-19. doi:10.1128/AEM.02265-19.

Uelze, L., Grütze, J., Borowiak, M., Hammerl, J. A., Juraschek, K., Deneke, C., et al. (2020). Typing methods based on whole genome sequencing data. *One Health Outlook* 2, 3. doi:10.1186/s42522-020-0010-1.

Yoshida, C. E., Kruczkiewicz, P., Laing, C. R., Lingohr, E. J., Gannon, V. P. J., Nash, J. H. E., et al. (2016). The *Salmonella in silico* typing resource (SISTR): An open web-accessible tool for rapidly typing and subtyping draft *Salmonella* genome assemblies. *PloS One* 11, e0147101. doi:10.1371/journal.pone.0147101.

## 574 Tables and Figures

575 **Table 1: Strain characteristics of analysed DNA samples** (species, serovar, MLST,  
576 size and GC content) used in the interlaboratory study.

| Sample       | Species                                           | Serovar               | MLST | Size (Mbp) | GC (%) |
|--------------|---------------------------------------------------|-----------------------|------|------------|--------|
| 19-RV1-P64-1 | <i>Campylobacter jejuni</i>                       |                       | 4774 | 1.6        | 30.5   |
| 19-RV1-P64-2 | <i>Campylobacter jejuni</i>                       |                       | 21   | 1.7        | 30.5   |
| 19-RV1-P64-3 | <i>Listeria monocytogenes</i>                     | IIc                   | 9    | 3.0        | 38.0   |
| 19-RV1-P64-4 | <i>Listeria monocytogenes</i>                     | IIb                   | 59   | 3.0        | 37.9   |
| 19-RV1-P64-5 | <i>Salmonella enterica</i> subsp. <i>enterica</i> | Infantis              | 32   | 5.1        | 52.0   |
| 19-RV1-P64-6 | <i>Salmonella enterica</i> subsp. <i>enterica</i> | Paratyphi B var. Java | 28   | 4.8        | 52.2   |

577 **Figure 1:**

578 The bar plot shows the mean percentage of total bases with a phred score above or  
579 equal to Q30 grouped by laboratories and samples. Line-connected points indicate the  
580 variance between sequencing runs (run A / run B), with the exception of laboratories  
581 L02 and LC08 (single sequencing run). Fill colours identify the sequencing instrument.  
582 The species of the samples is indicated. The dotted line marks a Q30 of 80%.

583 **Figure 2:**

584 The bar plot shows the mean total number of bases encompassed by the raw reads  
585 grouped by laboratories and samples. Line-connected points indicate the variance

586 between sequencing runs (run A / run B), with the exception of laboratories L02 and  
587 LC08 (single sequencing run). Fill colours identify the sequencing instrument. The  
588 species of the samples is indicated. The y-axis is squared.

589 **Figure 3:**

590 The bar plot shows the mean coverage depth grouped by laboratories and samples.  
591 Line-connected points indicate the variance between sequencing runs (run A / run B),  
592 with the exception of laboratories L02 and LC08 (single sequencing run). The coverage  
593 depth was defined as the sum of the length of all raw reads divided by the length of the  
594 respective PacBio reference sequence. Fill colours identify the sequencing instrument.  
595 The species of the samples is indicated. The y-axis is squared. The dotted line marks a  
596 coverage depth of 30x.

597 **Figure 4:**

598 The bar plot (left y-axis) shows the mean normalized coverage depth grouped by  
599 laboratories and species of the samples with error bar. The coverage depth was  
600 normalized for each laboratory to the coverage depth for sample 19-RV1-P64-1,  
601 sequencing run A, which was assigned a value of 1. The coverage depth was defined  
602 as the sum of the length of all raw reads divided by the length of the respective PacBio  
603 reference sequence. Fill colours identify, whether DNA libraries were pooled relative to  
604 genome sizes prior to sequencing or whether DNA libraries were pooled equally. The  
605 brown line graph in the background (right y-axis) indicates the average genome size of  
606 the species.

607 **Figure 5:**

608 The bar plot shows the mean N50 determined for the short-read genome assemblies  
609 grouped by laboratories and samples. Line-connected points indicate the variance  
610 between sequencing runs (run A / run B), with the exception of laboratories L02 and  
611 LC08 (single sequencing run). Fill colours identify the sequencing instrument. The  
612 species of the samples is indicated.

613 **Figure 6:**

614 The dot plot shows the correlation between N50 and coverage depth for the short-read  
615 genome assemblies / sequence data sets. Fill colours indicate the sequencing  
616 instrument.

617 **Figure 7:**

618 The figure shows the cgMLST distance matrix for sample 19-RV1-P64-1. Laboratories  
619 (LC01-LC10) and respective sequencing runs (run A / run B) are identified. The red box,  
620 arrow and text demonstrate how the median cgMLST distance was determined.

621 **Figure 8:**

622 The bar plot shows the mean median cgMLST distance grouped by laboratories and  
623 samples. Line-connected points indicate the variance between sequencing runs (run A /  
624 run B), with the exception of laboratories L02 and LC08 (single sequencing run). Fill  
625 colours identify the sequencing instrument. The species of the samples is indicated.

626 **Supplementary Files**

627 **Supplementary File 1:**

628 **Table S1:** General information about the strains used for the interlaboratory study.

629 **Table S2:** Information about the uncirculated PacBio sequences used as reference  
630 sequences for SNP calling.

631 **Table S3:** Antimicrobial resistance genes and plasmid markers identified from the  
632 uncirculated PacBio sequences.

633 **Supplementary File 2:**

634 The questionnaire template in German language.

635 **Supplementary File 3:**

636 Summarized results from the questionnaire.

637 **Supplementary File 4:**

638 Sequence quality parameters for all sample sets.

639 **Supplementary File 5:**

640 CgMLST distance allele matrices for all samples.

641 **Supplementary File 6:**

642 SNP distance allele matrices for all samples.

643 **Supplementary File 7:** Figures show the global GC-bias across the whole genome  
644 calculated using Benjamini's method (Benjamini and Speed, 2012) with the  
645 computeGCBias function of the deepTools package (Ramírez et al., 2016) for all sample  
646 sets. The function counts the number of reads per GC fraction and compares them to  
647 the expected GC profile, calculated by counting the number of DNA fragments per GC  
648 fraction in a reference genome. In an ideal experiment, the observed GC profile would  
649 match the expected profile, producing a flat line at 0. The fluctuations to both ends of  
650 the x-axis are due to the fact that only a small number of genome regions have extreme  
651 GC fractions.

Figure 1

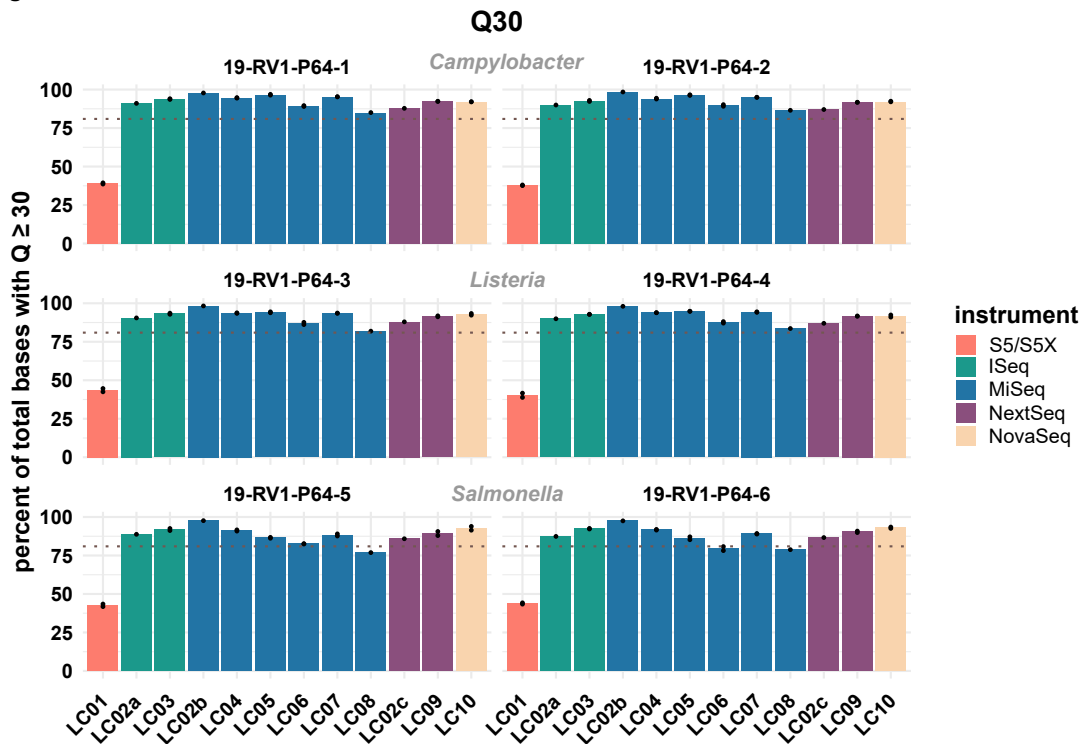

Figure 2

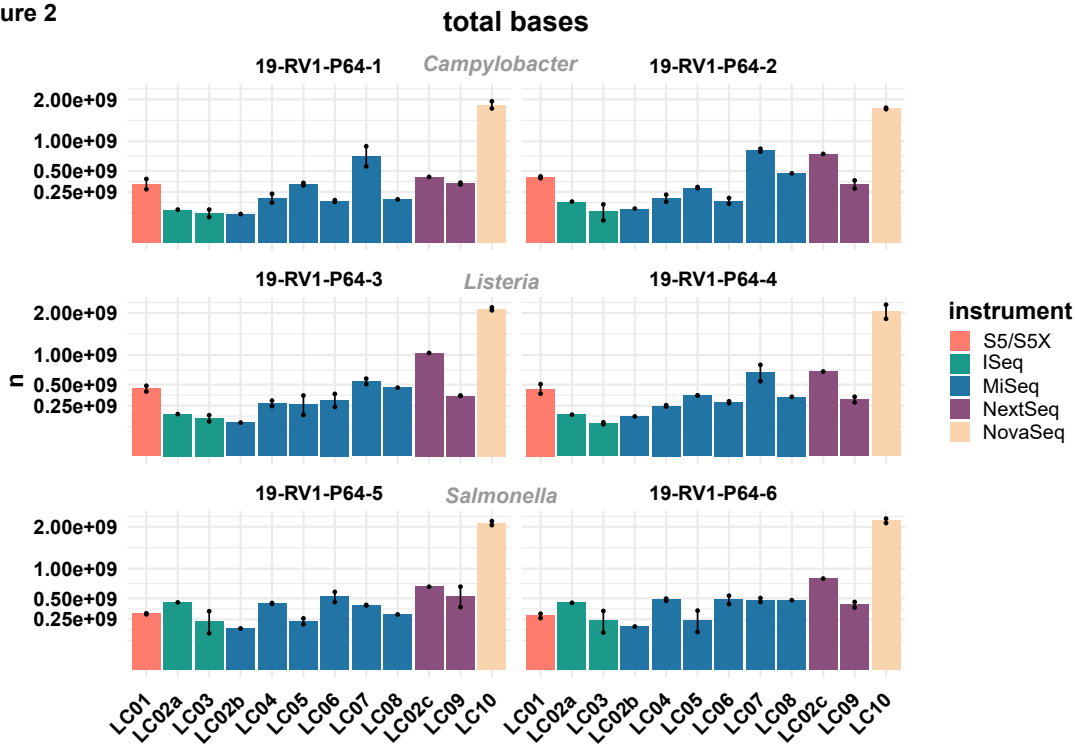

Figure 3

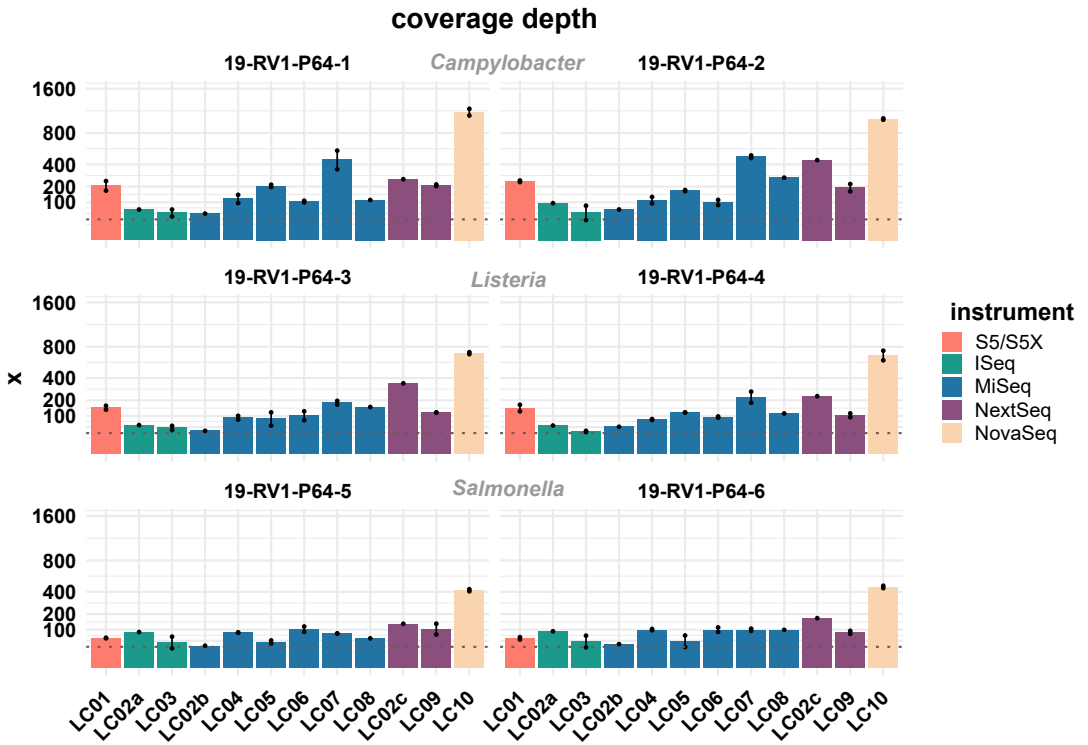

Figure 4

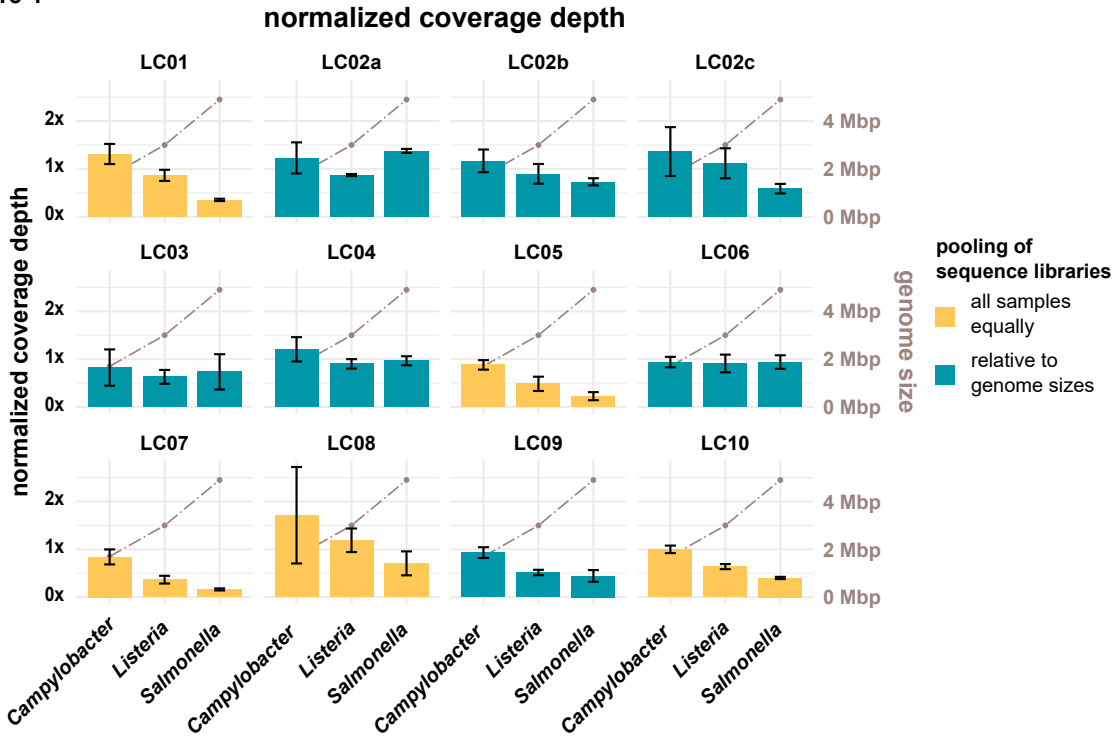



Figure 5

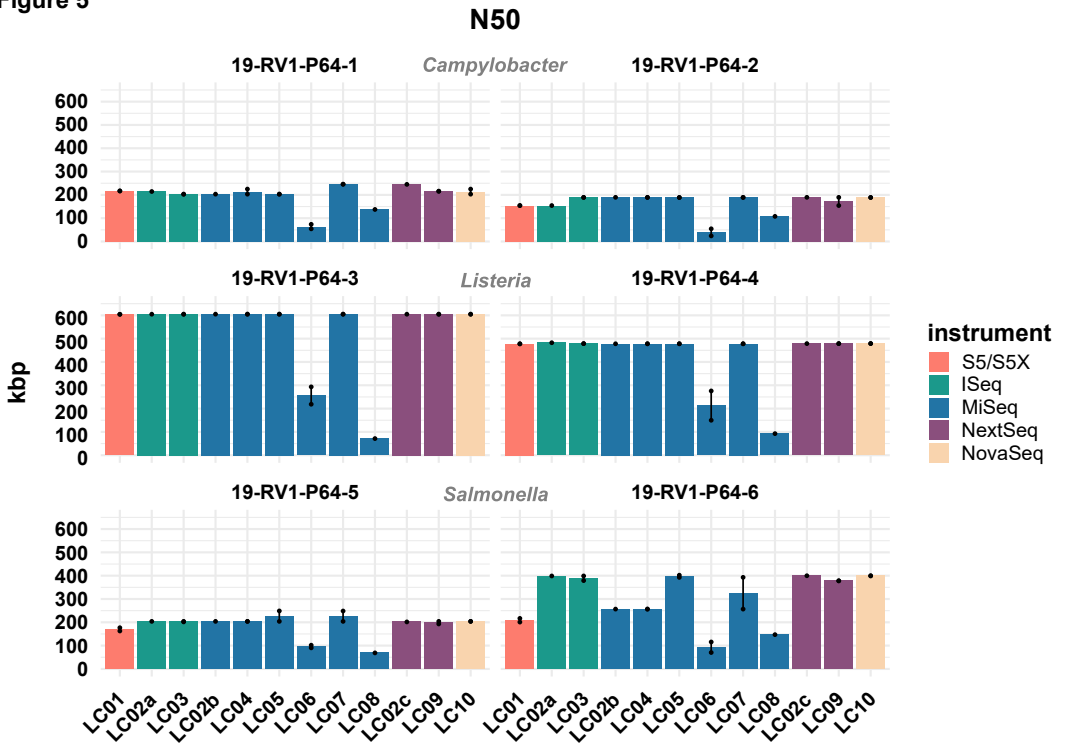

Figure 6

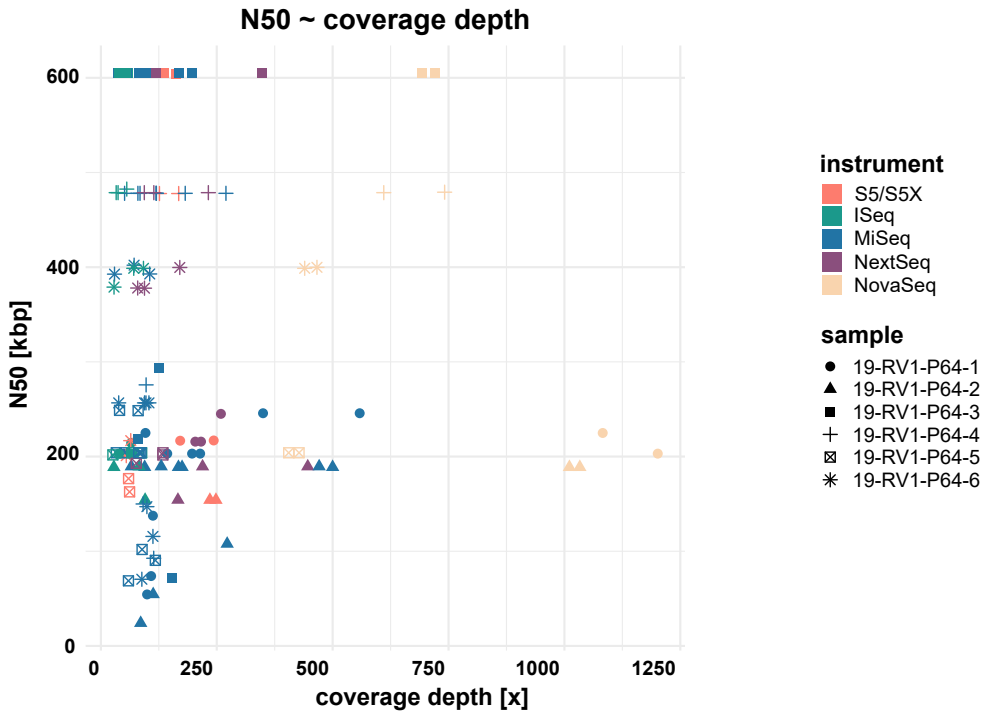

Figure 7

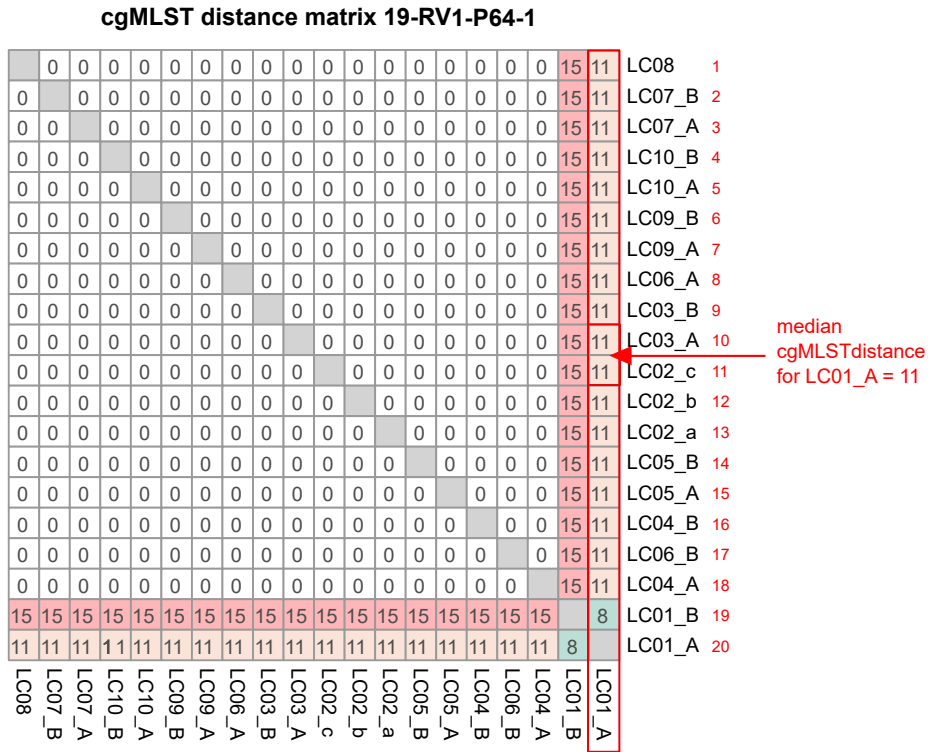

Figure 8

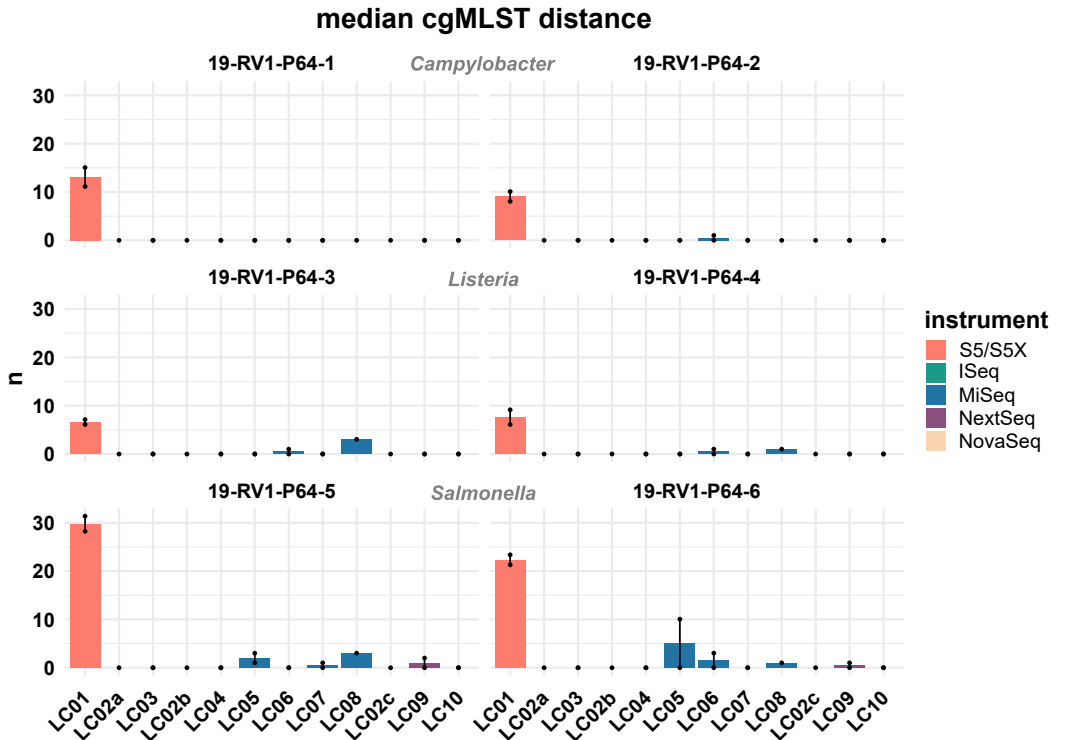

Source: https://biorxiv.org/content/10.1101/2020.04.22.054759v1.full.pdf
